# Supplementary material for: Analysis of immune-related signatures of colorectal cancer identifying two different immune phenotypes: Evidence for immune checkpoint inhibitor therapy
Source: PubMed Central journal article supplement — Oncol Lett. 2020 May 13;20(1):517–24. doi: 10.3892/ol.2020.11605 (PMC7285802; doi:10.3892/ol.2020.11605), 2020-05-13
Supplement: Supplementary_Data.pdf [file Supplementary_Data.pdf]

Figure S1. Heatmap representation of non-negative matrix factorization clustering analysis.

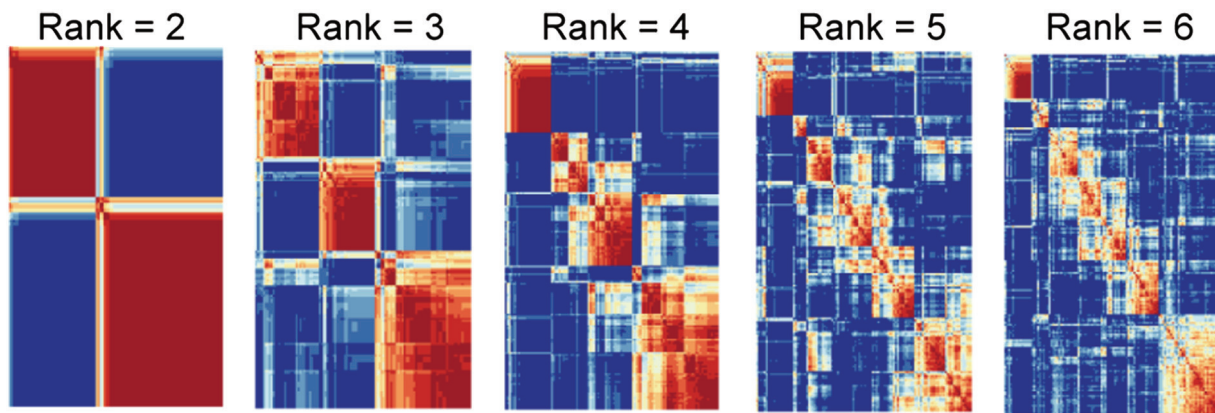

Figure S2. Difference in infiltration proportion of 22 immune cells between the two CRC subtypes, determined by the CIBERSORT algorithm on The Cancer Genome Atlas cohort.

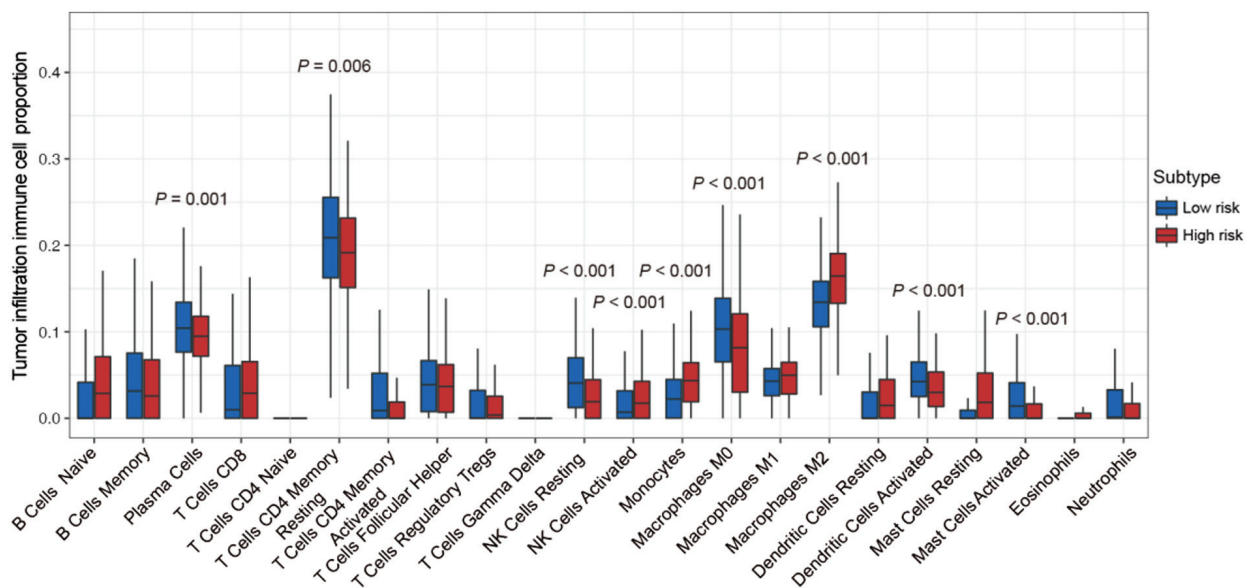

Figure S3. Multivariate logistic analysis of low-risk versus high-risk subtypes in association with tumor mutation burden, with DNA repair-related genes and clinical factors taken into consideration.

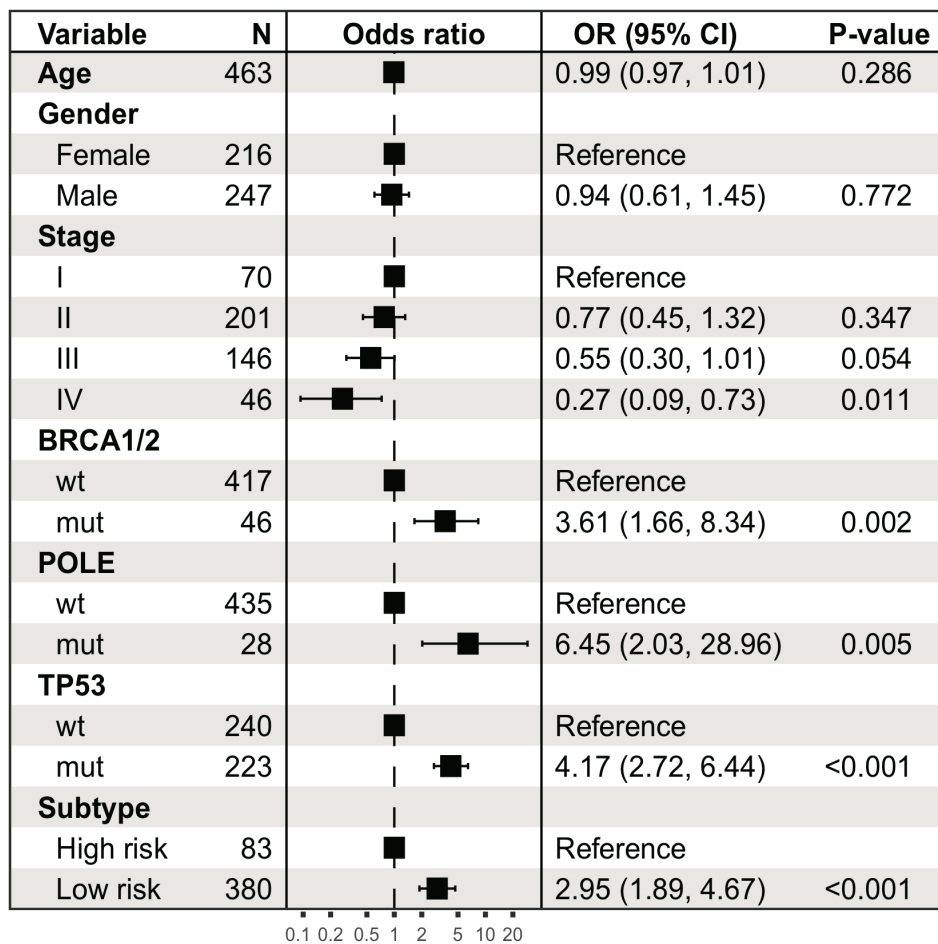

Table SI. Clinical characteristics of four CRC cohorts.

|                   | TCGA         | GSE103479    | GSE38832     | GSE87211     |
|-------------------|--------------|--------------|--------------|--------------|
| Age (range, mean) | 31-90, 66.33 | 35-88, 64.26 | 32-89, 59.63 | 38-88, 63.16 |
| Gender            |              |              |              |              |
| Male              | 338          | 83           | 69           | 182          |
| Female            | 302          | 72           | 53           | 160          |

Table SII. Summary of TCGA and three validation datasets included in the present study.

| Datasets  | Platforms                                             | Sample size, n |
|-----------|-------------------------------------------------------|----------------|
| TCGA      | Illumina RNAseq HTSeq                                 | 662            |
| GSE103479 | Almac Diagnostics Custom Xcel array                   | 155            |
| GSE38832  | Affymetrix Human Genome U133 Plus 2.0 Array           | 122            |
| GSE87211  | Agilent-026652 Whole Human Genome Microarray 4x44K v2 | 132            |
| Total     |                                                       | 1,281          |

TCGA, The Cancer Genome Atlas.

Table SIII. Genes (n=53) with P<0.01 upon univariate survival analysis.

| Gene           | P-value     |
|----------------|-------------|
| <i>CD1B</i>    | 0.000140798 |
| <i>PCOLCE2</i> | 0.000148648 |
| <i>HSPA1A</i>  | 0.000876168 |
| <i>INHBB</i>   | 0.001003066 |
| <i>FABP4</i>   | 0.001019566 |
| <i>GPSM1</i>   | 0.001038065 |
| <i>MMP1</i>    | 0.001208366 |
| <i>ATP2A1</i>  | 0.001731698 |
| <i>CD1A</i>    | 0.001880768 |
| <i>GPX3</i>    | 0.001894362 |
| <i>CYP11A1</i> | 0.002024162 |
| <i>FAM127A</i> | 0.002438041 |
| <i>LEP</i>     | 0.002710278 |
| <i>SRPX</i>    | 0.002718509 |
| <i>WNT10B</i>  | 0.002802413 |
| <i>ANGPTL4</i> | 0.002998865 |
| <i>AOC3</i>    | 0.003119582 |
| <i>CXCL1</i>   | 0.003536822 |
| <i>RAB3IL1</i> | 0.003609254 |
| <i>MFNG</i>    | 0.003705367 |
| <i>HLX</i>     | 0.003798359 |
| <i>MMP3</i>    | 0.004290524 |
| <i>CCBE1</i>   | 0.004771208 |
| <i>NFATC4</i>  | 0.004846608 |
| <i>APOD</i>    | 0.005133551 |
| <i>SPEG</i>    | 0.005325678 |
| <i>ALAS2</i>   | 0.005664381 |
| <i>C7</i>      | 0.005698703 |
| <i>SLC39A8</i> | 0.005814463 |
| <i>LRCH4</i>   | 0.006130749 |
| <i>DTX1</i>    | 0.006624096 |
| <i>CALB2</i>   | 0.006929051 |
| <i>RBM3</i>    | 0.007458747 |
| <i>KCTD1</i>   | 0.007468853 |
| <i>FUT5</i>    | 0.007606405 |
| <i>TPM2</i>    | 0.007817163 |
| <i>ACACB</i>   | 0.007869533 |
| <i>DPP7</i>    | 0.007892607 |
| <i>PTGIS</i>   | 0.008346155 |
| <i>CCL22</i>   | 0.008391792 |
| <i>ICOS</i>    | 0.008717258 |
| <i>DAPK1</i>   | 0.008776385 |
| <i>SYNGR3</i>  | 0.008798855 |
| <i>EPHB2</i>   | 0.009037823 |
| <i>BCL6</i>    | 0.009038485 |
| <i>NPTXR</i>   | 0.009287815 |
| <i>HMMR</i>    | 0.009295231 |
| <i>CDC25C</i>  | 0.009470687 |
| <i>CECR6</i>   | 0.009552709 |
| <i>IL13RA2</i> | 0.009601268 |
| <i>FAM102A</i> | 0.009762443 |
| <i>CXCL2</i>   | 0.009836522 |
| <i>PRTN3</i>   | 0.009992521 |
